# Supplementary material for: Intraindividual variability in non-household contacts: a German longitudinal study, April 2020–December 2021
Source: Research Square preprint supplement (doi:10.21203/rs.3.rs-7796845/v1), 2025-11-20
Supplement: Supplementary file 1 [file 626deeb87825072b2b59bfb2.xlsx]

## Sheet: Table S1
	Table S1: Variables deifinition
	Variable in the Analysis	Type	Wave	Description in the survey	Categories in the Survey	Categories in the Analysis	Variable in the Survey
	Age	integer	1-33	Age of the participant	NA	NA
	Age group	categorical	1-33	Based on age of the participant	NA	0-18, 19-45, 46-65, >=66	NA
	Gender	categorical	1-33	Gender of the participants	Female, male, diverse	Female and male, diverse was categorized as NA
	Household size	integer	1-33	The number of participant's household size	NA	NA
	Household size group	categorical	1-33	Based on household size of the participant	NA	1, 2, >=3
	Occupational status	categorical	1-33	Based on answer about occupation, the information was further categorized	Employed, retired, housemaker, student, unemployed	Employed, retired, housemaker, student, unemployed
	Wave n	integer	1-33	Computed based on number of waves that participant had joined	NA	NA
	Days of year	integer	1-33	Computed from reporting date	NA	NA
	Weekday	factor	1-33	day of the week, computed from the reporting date	NA	NA
	Vaccine period	categorical	1-33	Vaccination-period was derived from self-reported vaccination dates. Observations were categorized into three periods: pre-vaccination (before 26 December 2020, when vaccines were unavailable), post-unvaccinated (after vaccines became available and the participant was not vaccinated), and post-vaccinated (after vaccines became available and the participant was vaccinated).	NA	pre-vaccination, pre-vaccination,post-vaccinated
	Pre-health	categorical	1-13	Do you or any other member of your household belong to a risk group for which the yearly flu vaccination is recommended?	Yes or no	Yes or no	flu
	Quarantine or isolation	categorical	1-13	For quarantine: You may have been asked to do so or have voluntarily decided to take various measures against the coronavirus (Covid-19). Please think back to the past seven days and select the appropriate answer for each of the actions listed below. In the past seven days, you / [name] have been asked to ...	Yes or no	Yes or no	quarantine
				For isolation: You may have been asked to do so or have voluntarily decided to take various measures against the coronavirus (Covid-19). Please think back to the past seven days and select the appropriate answer for each of the actions listed below. In the past seven days, you / [name] have been asked to ...	Yes or no		isolate
			14-33	In the last seven days have you or has anyone in your household been in isolation or quarantine due to coronavirus (Covid-19)? This includes whether you have stayed at home after potential exposure to an infected case, or were asked to quaratine on return from a trip abroad, or separated yourself from people who are not infected, including any household members. You can be in isolation in your ho…	Yes or no		isolation_or_quarantine_last_seven_days
		categorical	14-33	Are you or any other household member in a medium risk group, meaning you could have serious symptoms if you contracted Coronavirus (COVID-19)? Medium risk groups include individuals who: have a lung condition that is not severe (such as asthma, COPD, emphysema or bronchitis), have heart disease (e.g. heart failure), have diabetes, have chronic, kidney or liver disease, have a condition affecting…	Yes or no	when a participant answered yes to eith med_risk or high_risk, it was taken as having a pre-existing health issue, when answered to both med_risk and high_risk were no, then the value of this variable is no.	med_risk
			14-33	Are you or any other household member in in a high risk group, meaning you/they could have serious symptoms if you contracted Coronavirus (COVID-19)? High risk groups include individuals who: have had an organ transplant, undergoing cancer treatment, have blood or bone marrow cancer, have had a bone marrow or stem cell transplant in the past 6 months, are taking immunosuppressant medicine or high…	Yes or no		high_risk
	Self-risk perception	categorical	1-33	Coronavirus would be a serious illness for me - HERE: The person filling out the questionnaire	Strongly agree, tend to agree, strongyly disagree, tend to disagree, neither agrree nor disagrree	when participant answered strongly agree or tend to agree, the value is high. when answered strongly disagree or tend to disagree, the value is low. When answered neither agree nor disagree, the value is neutral.	cor_ser_ill_0
	dt_day	integer		For each participant who joined more than two waves, the interval, days difference between i wave and l wave were computed
	stringency index	integer	1-33	a measure index of the govrnment stringency strickness

## Sheet: Table S2
	Table S2 Sensitivity Analyses: Mean Ratios and 95% confidence intervals (CIs) between riSD and covariates from Research Questions 1, 2, and 3
	sensitivity analysis 1 (number of observations per individual >= 3)
		1st Research Question	2nd Research Question	3rd Research Question
	Variable	Mean Ratio (95% CI)
	Age group: 19-45	ref	ref	ref
	Age group: 0-18	1.13 (1.10-1.16)	1.28 (1.01-1.61)	1.18 (1.13-1.23)
	Agegroup: 46-65	0.98 (0.96-1.00)	1.03 (0.93-1.13)	0.98 (0.95-1.01)
	Age group: >=66	0.99 (0.97-1.01)	1.10 (0.99-1.23)	0.98 (0.95-1.01)
	Gender: Male	ref	ref	ref
	Gender: Female	1.01 (0.99-1.02)	1.05 (0.98-1.13)	1.03 (1.01-1.05)
	Household size: 1	ref	ref	ref
	Household size: 2	1.00 (0.98-1.02)	0.89 (0.82-0.97)	1.01 (0.98-1.03)
	Household size: >=3	1.04 (1.02-1.06)	0.91 (0.82-1.00)	1.00 (0.97-1.03)
	Occupational status: Employed	ref	ref	ref
	Occupational status: Retired	0.94 (0.92-0.96)	1.04 (0.95-1.14)	0.98 (0.95-1.00)
	Occupational status: Homemaker	0.88 (0.85-0.91)	1.14 (0.95-1.37)	0.93 (0.88-0.97)
	Occupational status: Student	0.97 (0.94-1.00)	1.20 (1.00-1.44)	0.92 (0.87-0.97)
	Occupational status: Unemployed	0.91 (0.88-0.94)	1.08 (0.91-1.27)	0.90 (0.86-0.95)
	Vaccine: unvaccinated	NA	ref	NA
	Vaccine: vaccinated	NA	1.03 (0.95-1.10)	NA
	Stringency index: >= 70	NA	NA	ref
	Stringency index: < 70	NA	NA	1.38 (1.35-1.42)
	sensitivity analysis 2 (number of observations per individual >= 4)
		1st Research Question	2nd Research Question	3rd Research Question
	Variable	Mean Ratio (95% CI)
	Age group: 19-45	ref	ref	ref
	Age group: 0-18	1.13 (1.10-1.16)	1.59 (0.90-2.80)	1.20 (1.15-1.25)
	Agegroup: 46-65	0.97 (0.95-0.99)	1.08 (0.92-1.26)	1.00 (0.97-1.03)
	Age group: >=66	0.98 (0.96-1.00)	1.34 (1.14-1.59)	0.99 (0.95-1.02)
	Gender: Male	ref	ref	ref
	Gender: Female	1.01 (0.99-1.02)	1.03 (0.92-1.15)	1.04 (1.01-1.06)
	Household size: 1	ref	ref	ref
	Household size: 2	1.00 (0.98-1.02)	0.83 (0.73-0.94)	1.01 (0.98-1.04)
	Household size: >=3	1.04 (1.02-1.06)	0.78 (0.67-0.91)	1.01 (0.98-1.04)
	Occupational status: Employed	ref	ref	ref
	Occupational status: Retired	0.94 (0.93-0.96)	1.18 (1.04-1.34)	0.97 (0.94-1.00)
	Occupational status: Homemaker	0.88 (0.85-0.91)	0.77 (0.56-1.05)	0.93 (0.88-0.98)
	Occupational status: Student	0.97 (0.94-1.01)	1.85 (1.35-2.54)	0.96 (0.90-1.01)
	Occupational status: Unemployed	0.91 (0.88-0.94)	1.34 (1.01-1.72)	0.90 (0.85-0.94)
	Vaccine: unvaccinated	NA	ref	NA
	Vaccine: vaccinated	NA	1.10 (0.98-1.22)	NA
	Stringency index: >= 70	NA	NA	ref
	Stringency index: < 70	NA	NA	1.38 (1.35-1.42)
	sensitivity analysis 3 (vaccine analyses with narrower time windows)
		2nd Research Question
	Variable	n = 2, (100vs100), main analysis	n = 2, (30vs30)	n = 2, (40vs40)	n = 2, (50vs50)	n = 2, (50vs30)
	Age group: 19-45	ref	ref	ref	ref	ref
	Age group: 0-18	1.49 (1.27-1.75)	0.29 (0.04-2.03)	0.96 (0.51-1.78)	1.25 (0.85-1.85)	2.36 (1.14-4.86)
	Agegroup: 46-65	0.99 (0.91-1.07)	0.94 (0.39-2.29)	1.12 (0.86-1.47)	1.01 (0.86-1.18)	1.11 (0.82-1.51)
	Age group: >=66	1.04 (0.95-1.16)	1.16 (0.30-4.43)	0.89 (0.65-1.22)	1.08 (0.90-1.29)	1.52 (1.05-2.20)
	Gender: Male	ref	ref	ref	ref	ref
	Gender: Female	1.02 (0.96-1.09)	2.04 (0.84-4.91)	1.17 (0.96-1.42)	1.08 (0.96-1.21)	1.13 (0.88-1.44)
	Household size: 1	ref	ref	ref	ref	ref
	Household size: 2	0.91 (0.84-0.98)	0.47 (0.25-0.90)	0.88 (0.70-1.10)	0.98 (0.86-1.12)	0.91 (0.70-1.18)
	Household size: >=3	0.89 (0.82-0.97)	1.90 (0.32-11.23)	0.83 (0.62-1.12)	0.85 (0.72-1.00)	0.77 (0.56-1.06)
	Occupational status: Employed	ref	ref	ref	ref	ref
	Occupational status: Retired	1.02 (0.95-1.11)	0.38 (0.13-1.08)	1.08 (0.83-1.39)	1.06 (0.91-1.22)	0.98 (0.74-1.31)
	Occupational status: Homemaker	0.97 (0.84-1.14)	0.00 (0.00-0.04)	1.29 (0.78-2.14)	0.77 (0.56-1.06)	1.31 (0.65-2.67)
	Occupational status: Student	1.11 (0.95-1.30)	NA	1.54 (0.97-2.45)	1.33 (0.99-1.80)	1.28 (0.70-2.24)
	Occupational status: Unemployed	0.99 (0.86-1.14)	1.27 (0.33-4.87)	1.19 (0.74-1.91)	1.16 (0.89-1.49)	1.26 (0.71-2.25)
	Vaccine: unvaccinated	ref	ref	ref	ref	ref
	Vaccine: vaccinated	0.99 (0.93-1.06)	1.34 (0.75-2.37)	0.94 (0.77-1.14)	0.90 (0.80-1.01)	0.86 (0.68-1.07)
	sensitivity analysis 4 (stringency measures analysis with 65 and 80 as threshold)
		3rd Research Question
	Variable	70 (main result)	65	80
	Age group: 19-45	ref	ref	ref
	Age group: 0-18	1.20 (1.15-1.25)	1.16 (1.11-1.20)	1.21 (1.16-1.27)
	Agegroup: 46-65	1.00 (0.97-1.03)	0.99 (0.96-1.02)	1.02 (0.99-1.06)
	Age group: >=66	0.99 (0.95-1.02)	0.99 (0.96-1.03)	0.96 (0.92-1.00)
	Gender: Male	ref	ref	ref
	Gender: Female	1.04 (1.01-1.06)	1.02 (0.96-1.03)	1.03 (1.01-1.06)
	Household size: 1	ref	ref	ref
	Household size: 2	1.01 (0.98-1.04)	0.99 (0.96-1.01)	1.01 (0.98-1.04)
	Household size: >=3	1.01 (0.98-1.04)	1.01 (0.98-1.04)	1.04 (1.00-1.07)
	Occupational status: Employed	ref	ref	ref
	Occupational status: Retired	0.97 (0.94-1.00)	0.96 (0.93-0.98)	1.01 (0.98-1.04)
	Occupational status: Homemaker	0.93 (0.88-0.98)	0.90 (0.86-0.95)	0.88 (0.83-0.94)
	Occupational status: Student	0.96 (0.90-1.01)	0.99 (0.94-1.04)	0.96 (0.91-1.02)
	Occupational status: Unemployed	0.90 (0.85-0.94)	0.93 (0.89-0.97)	0.88 (0.84-0.92)
	Stringency index: >= 70	ref	NA	ref
	Stringency index: < 70	1.38 (1.35-1.41)	1.18 (1.16-1.21)	1.71 (1.65-1.77)
	sensitivity analysis 5 (complete data)
		main results			using complete data results
		1st Research Question	2nd Research Question	3rd Research Question	1st Research Question	2nd Research Question	3rd Research Question
	Variable	Mean Ratio (95% CI)			Mean Ratio (95% CI)
	Age group: 19-45	ref	ref	ref	ref	ref	ref
	Age group: 0-18	1.13 (1.10-1.16)	1.49 (1.27-1.75)	1.16 (1.11-1.20)	1.14 (1.11-1.17)	1.73 (1.45-2.06)	1.19 (1.15-1.25)
	Agegroup: 46-65	0.99 (0.97-1.01)	0.99 (0.91-1.07)	0.98 (0.95-1.01)	0.99 (0.97-1.01)	1.04 (0.94-1.13)	0.98 (0.95-1.01)
	Age group: >=66	1.00 (0.98-1.02)	1.04 (0.95-1.16)	0.96 (0.93-1.00)	1.02 (1.00-1.05)	1.12 (1.01-1.25)	0.97 (0.94-1.01)
	Gender: Male	ref	ref	ref	ref	ref	ref
	Gender: Female	1.00 (0.99-1.02)	1.02 (0.96-1.09)	1.02 (1.00-1.04)	1.00 (0.98-1.01)	1.03 (0.96-1.10)	1.01 (0.98-1.03)
	Household size: 1	ref	ref	ref	ref	ref	ref
	Household size: 2	1.00 (0.98-1.02)	0.91 (0.84-0.98)	1.00 (0.98-1.03)	1.00 (0.98-1.02)	0.90 (0.83-0.98)	1.00 (0.97-1.02)
	Household size: >=3	1.04 (1.02-1.06)	0.89 (0.82-0.97)	1.01 (0.98-1.04)	1.05 (1.03-1.07)	0.88 (0.80-0.96)	0.99 (0.96-1.02)
	Occupational status: Employed	ref	ref	ref	ref	ref	ref
	Occupational status: Retired	0.94 (0.92-0.96)	1.02 (0.95-1.11)	0.97 (0.95-1.00)	0.94 (0.92-0.96)	1.02 (0.93-1.11)	0.97 (0.96-1.01)
	Occupational status: Homemaker	0.88 (0.85-0.91)	0.97 (0.84-1.14)	0.89 (0.84-0.93)	0.86 (0.83-0.89)	1.09 (0.91-1.30)	0.91 (0.86-0.96)
	Occupational status: Student	0.97 (0.93-1.00)	1.11 (0.95-1.30)	0.92 (0.88-0.96)	0.96 (0.92-0.99)	1.18 (1.00-1.40)	0.90 (0.84-0.94)
	Occupational status: Unemployed	0.91 (0.88-0.94)	0.99 (0.86-1.14)	0.92 (0.88-0.96)	0.89 (0.86-0.92)	1.10 (0.93-1.29)	0.92 (0.88-0.97)
	Vaccine: unvaccinated	NA	ref	NA	NA	ref	NA
	Vaccine: vaccinated	NA	0.99 (0.93-1.06)	NA	NA	1.05 (0.98-1.12)	NA
	Stringency index: >= 70	NA	NA	ref	NA	NA	ref
	Stringency index: < 70	NA	NA	1.34 (1.31-1.37)	NA	NA	1.36 (1.33-1.40)
	sensitivity analysis 6 (reporting interval <= 100)
		main results			reporting interval <= 100
		1st Research Question	2nd Research Question	3rd Research Question	1st Research Question	2nd Research Question	3rd Research Question
	Variable	Mean Ratio (95% CI)			Mean Ratio (95% CI)
	Age group: 19-45	ref	ref	ref	ref	ref	ref
	Age group: 0-18	1.13 (1.10-1.16)	1.49 (1.27-1.75)	1.16 (1.11-1.20)	1.13 (1.10-1.16)	1.49 (1.27-1.75)	1.16 (1.11-1.21)
	Agegroup: 46-65	0.99 (0.97-1.01)	0.99 (0.91-1.07)	0.98 (0.95-1.01)	0.99 (0.97-1.01)	0.98 (0.90-1.07)	0.98 (0.96-1.01)
	Age group: >=66	1.00 (0.98-1.02)	1.04 (0.95-1.16)	0.96 (0.93-1.00)	1.00 (0.98-1.03)	1.04(0.95-1.15)	0.97 (0.94-1.01)
	Gender: Male	ref	ref	ref	ref	ref	ref
	Gender: Female	1.00 (0.99-1.02)	1.02 (0.96-1.09)	1.02 (1.00-1.04)	1.01 (1.00-1.03)	1.03 (0.97-1.10)	1.03 (1.01-1.05)
	Household size: 1	ref	ref	ref	ref	ref	ref
	Household size: 2	1.00 (0.98-1.02)	0.91 (0.84-0.98)	1.00 (0.98-1.03)	1.01 (0.99-1.03)	0.90 (0.84-0.97)	1.01 (0.98-1.03)
	Household size: >=3	1.04 (1.02-1.06)	0.89 (0.82-0.97)	1.01 (0.98-1.04)	1.05 (1.02-1.07)	0.89 (0.81-0.96)	1.02 (0.99-1.05)
	Occupational status: Employed	ref	ref	ref	ref	ref	ref
	Occupational status: Retired	0.94 (0.92-0.96)	1.02 (0.95-1.11)	0.97 (0.95-1.00)	0.94 (0.93-0.96)	1.03 (0.95-1.12)	0.97 (0.95-1.01)
	Occupational status: Homemaker	0.88 (0.85-0.91)	0.97 (0.84-1.14)	0.89 (0.84-0.93)	0.90 (0.87-0.93)	0.97 (0.83-1.13)	0.91 (0.86-0.96)
	Occupational status: Student	0.97 (0.93-1.00)	1.11 (0.95-1.30)	0.92 (0.88-0.96)	0.95 (0.92-0.99)	1.07 (0.91-1.25)	0.92 (0.88-0.97)
	Occupational status: Unemployed	0.91 (0.88-0.94)	0.99 (0.86-1.14)	0.92 (0.88-0.96)	0.91 (0.89-0.94)	1.01 (0.88-1.16)	0.93 (0.89-0.97)
	Vaccine: unvaccinated	NA	ref	NA	NA	ref	NA
	Vaccine: vaccinated	NA	0.99 (0.93-1.06)	NA	NA	1.02 (0.96-1.08)	NA
	Stringency index: >= 70	NA	NA	ref	NA	NA	ref
	Stringency index: < 70	NA	NA	1.34 (1.31-1.37)	NA	NA	1.33 (1.30-1.36)
	sensitivity analysis 7 (reporting interval <= 50)
		main results			reporting interval <= 50
		1st Research Question	2nd Research Question	3rd Research Question	1st Research Question	2nd Research Question	3rd Research Question
	Variable	Mean Ratio (95% CI)			Mean Ratio (95% CI)
	Age group: 19-45	ref	ref	ref	ref	ref	ref
	Age group: 0-18	1.13 (1.10-1.16)	1.49 (1.27-1.75)	1.16 (1.11-1.20)	1.14 (1.11-1.17)	1.44 (1.21-1.71)	1.16 (1.11-1.21)
	Agegroup: 46-65	0.99 (0.97-1.01)	0.99 (0.91-1.07)	0.98 (0.95-1.01)	0.99 (0.97-1.01)	0.96 (0.88-1.05)	0.98 (0.95-1.01)
	Age group: >=66	1.00 (0.98-1.02)	1.04 (0.95-1.16)	0.96 (0.93-1.00)	1.00 (0.98-1.02)	1.03 (0.93-1.14)	0.97 (0.94-1.00)
	Gender: Male	ref	ref	ref	ref	ref	ref
	Gender: Female	1.00 (0.99-1.02)	1.02 (0.96-1.09)	1.02 (1.00-1.04)	1.02 (1.00-1.03)	1.02 (0.95-1.09)	1.04 (1.02-1.06)
	Household size: 1	ref	ref	ref	ref	ref	ref
	Household size: 2	1.00 (0.98-1.02)	0.91 (0.84-0.98)	1.00 (0.98-1.03)	1.01 (0.99-1.03)	0.89 (0.82-0.96)	1.00 (0.97-1.03)
	Household size: >=3	1.04 (1.02-1.06)	0.89 (0.82-0.97)	1.01 (0.98-1.04)	1.04 (1.01-1.06)	0.86 (0.79-0.95)	1.00 (0.97-1.03)
	Occupational status: Employed	ref	ref	ref	ref	ref	ref
	Occupational status: Retired	0.94 (0.92-0.96)	1.02 (0.95-1.11)	0.97 (0.95-1.00)	0.95 (0.93-0.97)	1.07 (0.99-1.17)	0.98 (0.95-1.00)
	Occupational status: Homemaker	0.88 (0.85-0.91)	0.97 (0.84-1.14)	0.89 (0.84-0.93)	0.90 (0.86-0.93)	1.05 (0.88-1.24)	0.90 (0.86-0.95)
	Occupational status: Student	0.97 (0.93-1.00)	1.11 (0.95-1.30)	0.92 (0.88-0.96)	0.94 (0.91-0.98)	1.11 (0.94-1.32)	0.92 (0.87-0.97)
	Occupational status: Unemployed	0.91 (0.88-0.94)	0.99 (0.86-1.14)	0.92 (0.88-0.96)	0.93 (0.90-0.96)	1.03 (0.89-1.20)	0.94 (0.90-0.99)
	Vaccine: unvaccinated	NA	ref	NA	NA	ref	NA
	Vaccine: vaccinated	NA	0.99 (0.93-1.06)	NA	NA	1.02 (0.95-1.09)	NA
	Stringency index: >= 70	NA	NA	ref	NA	NA	ref
	Stringency index: < 70	NA	NA	1.34 (1.31-1.37)	NA	NA	1.33 (1.29-1.36)

## Sheet: Table S3
	Table S3 Stratified analyses: Mean Ratios and 95% confidence intervals (CIs) between riSD and covariates from Research Questions 1, 2, and 3
	stratified analysis 1-2 (age group)
		main results			age >= 66
		1st Research Question	2nd Research Question	3rd Research Question	1st Research Question	2nd Research Question	3rd Research Question
	Variable	Mean Ratio (95% CI)			Mean Ratio (95% CI)
	Age group: 19-45	ref	ref	ref	ref	ref	ref
	Age group: 0-18	1.13 (1.10-1.16)	1.49 (1.27-1.75)	1.16 (1.11-1.20)	NA	NA	NA
	Agegroup: 46-65	0.99 (0.97-1.01)	0.99 (0.91-1.07)	0.98 (0.95-1.01)	NA	NA	NA
	Age group: >=66	1.00 (0.98-1.02)	1.04 (0.95-1.16)	0.96 (0.93-1.00)	NA	NA	NA
	Gender: Male	ref	ref	ref	ref	ref	ref
	Gender: Female	1.00 (0.99-1.02)	1.02 (0.96-1.09)	1.02 (1.00-1.04)	0.98 (0.96-1.01)	0.98 (0.88-1.10)	0.98 (0.95-1.02)
	Household size: 1	ref	ref	ref	ref	ref	ref
	Household size: 2	1.00 (0.98-1.02)	0.91 (0.84-0.98)	1.00 (0.98-1.03)	0.97 (0.94-1.00)	0.74 (0.65-0.84)	0.94 (0.89-0.98)
	Household size: >=3	1.04 (1.02-1.06)	0.89 (0.82-0.97)	1.01 (0.98-1.04)	0.94 (0.90-0.97)	0.73 (0.63-0.85)	0.89 (0.85-0.94)
	Occupational status: Employed	ref	ref	ref	ref	ref	ref
	Occupational status: Retired	0.94 (0.92-0.96)	1.02 (0.95-1.11)	0.97 (0.95-1.00)	0.94 (0.91-0.97)	0.92 (0.82-1.03)	0.96 (0.92-1.00)
	Occupational status: Others	NA	NA	NA	1.05 (0.89, 1.24)	0.72 (0.35-1.51)	1.05 (0.84-1.31)
	Occupational status: Homemaker	0.88 (0.85-0.91)	0.97 (0.84-1.14)	0.89 (0.84-0.93)	NA	NA	NA
	Occupational status: Student	0.97 (0.93-1.00)	1.11 (0.95-1.30)	0.92 (0.88-0.96)	NA	NA	NA
	Occupational status: Unemployed	0.91 (0.88-0.94)	0.99 (0.86-1.14)	0.92 (0.88-0.96)	NA	NA	NA
	Vaccine: unvaccinated	NA	ref	NA	NA	ref	NA
	Vaccine: vaccinated	NA	0.99 (0.93-1.06)	NA	NA	1.07 (0.96-1.19)	NA
	Stringency index: >= 70	NA	NA	ref	NA	NA	ref
	Stringency index: < 70	NA	NA	1.34 (1.31-1.37)	NA	NA	1.29 (1.24-1.34)
		main results			18< age <= 65
		1st Research Question	2nd Research Question	3rd Research Question	1st Research Question	2nd Research Question	3rd Research Question
	Variable	Mean Ratio (95% CI)			Mean Ratio (95% CI)
	Age group: 19-45	ref	ref	ref	ref	ref	ref
	Age group: 0-18	1.13 (1.10-1.16)	1.49 (1.27-1.75)	1.16 (1.11-1.20)	NA	NA	NA
	Agegroup: 46-65	0.99 (0.97-1.01)	0.99 (0.91-1.07)	0.98 (0.95-1.01)	NA	NA	NA
	Age group: >=66	1.00 (0.98-1.02)	1.04 (0.95-1.16)	0.96 (0.93-1.00)	NA	NA	NA
	Gender: Male	ref	ref	ref	ref	ref	ref
	Gender: Female	1.00 (0.99-1.02)	1.02 (0.96-1.09)	1.02 (1.00-1.04)	1.02 (1.00-1.04)	1.04 (0.96-1.13)	1.04 (1.01-1.07)
	Household size: 1	ref	ref	ref	ref	ref	ref
	Household size: 2	1.00 (0.98-1.02)	0.91 (0.84-0.98)	1.00 (0.98-1.03)	1.02 (1.00-1.05)	0.93 (0.85-1.02)	1.05 (1.01-1.08)
	Household size: >=3	1.04 (1.02-1.06)	0.89 (0.82-0.97)	1.01 (0.98-1.04)	1.03 (1.00-1.06)	0.89 (0.80-0.99)	1.01 (0.97-1.04)
	Occupational status: Employed	ref	ref	ref	ref	ref	ref
	Occupational status: Retired	0.94 (0.92-0.96)	1.02 (0.95-1.11)	0.97 (0.95-1.00)	0.94 (0.92-0.97)	1.04 (0.93-1.17)	0.97 (0.93-1.01)
	Occupational status: Homemaker	0.88 (0.85-0.91)	0.97 (0.84-1.14)	0.89 (0.84-0.93)	0.85 (0.81-0.89)	1.06 (0.89-1.25)	0.85 (0.80-0.91)
	Occupational status: Student	0.97 (0.93-1.00)	1.11 (0.95-1.30)	0.92 (0.88-0.96)	1.02 (0.98-1.06)	1.13 (0.96-1.32)	0.96 (0.92-1.02)
	Occupational status: Unemployed	0.91 (0.88-0.94)	0.99 (0.86-1.14)	0.92 (0.88-0.96)	0.91 (0.88-0.95)	1.02 (0.88-1.18)	0.92 (0.88 :0.97)
	Vaccine: unvaccinated	NA	ref	NA	NA	ref	NA
	Vaccine: vaccinated	NA	0.99 (0.93-1.06)	NA	NA	0.93 (0.86-1.01)	NA
	Stringency index: >= 70	NA	NA	ref	NA	NA	ref
	Stringency index: < 70	NA	NA	1.34 (1.31-1.37)	NA	NA	1.33 (1.29-1.38)
	stratified analysis 3-4 (gender)
		main results			gender = male
		1st Research Question	2nd Research Question	3rd Research Question	1st Research Question	2nd Research Question	3rd Research Question
	Variable	Mean Ratio (95% CI)			Mean Ratio (95% CI)
	Age group: 19-45	ref	ref	ref	ref	ref	ref
	Age group: 0-18	1.13 (1.10-1.16)	1.49 (1.27-1.75)	1.16 (1.11-1.20)	1.19 (1.14-1.24)	1.97 (1.50-2.59)	1.27 (1.20-1.35)
	Agegroup: 46-65	0.99 (0.97-1.01)	0.99 (0.91-1.07)	0.98 (0.95-1.01)	0.97 (0.94-1.00)	1.09 (0.97-1.22)	0.98 (0.94-1.02)
	Age group: >=66	1.00 (0.98-1.02)	1.04 (0.95-1.16)	0.96 (0.93-1.00)	0.99 (0.96-1.03)	1.10 (0.96-1.26)	0.97 (0.93-1.02)
	Gender: Male	ref	ref	ref	ref	ref	ref
	Gender: Female	1.00 (0.99-1.02)	1.02 (0.96-1.09)	1.02 (1.00-1.04)	NA	NA	NA
	Household size: 1	ref	ref	ref	ref	ref	ref
	Household size: 2	1.00 (0.98-1.02)	0.91 (0.84-0.98)	1.00 (0.98-1.03)	1.02 (1.00-1.05)	0.87 (0.78-0.97)	1.03 (0.99-1.07)
	Household size: >=3	1.04 (1.02-1.06)	0.89 (0.82-0.97)	1.01 (0.98-1.04)	1.03 (1.00-1.06)	0.79 (0.70-0.89)	1.00 (0.96-1.04)
	Occupational status: Employed	ref	ref	ref	ref	ref	ref
	Occupational status: Retired	0.94 (0.92-0.96)	1.02 (0.95-1.11)	0.97 (0.95-1.00)	0.93 (0.91-0.96)	1.01 (0.91-1.13)	0.96 (0.93-1.00)
	Occupational status: Homemaker	0.88 (0.85-0.91)	0.97 (0.84-1.14)	0.89 (0.84-0.93)	0.93 (0.85-1.02)	1.14 (0.83-1.58)	0.98 (0.87-1.12)
	Occupational status: Student	0.97 (0.93-1.00)	1.11 (0.95-1.30)	0.92 (0.88-0.96)	1.02 (0.97-1.08)	1.42 (1.10-1.83)	0.97 (0.90-1.04)
	Occupational status: Unemployed	0.91 (0.88-0.94)	0.99 (0.86-1.14)	0.92 (0.88-0.96)	0.94 (0.90-0.98)	0.89 (0.73-1.09)	0.95 (0.89-1.00)
	Vaccine: unvaccinated	NA	ref	NA	NA	ref	NA
	Vaccine: vaccinated	NA	0.99 (0.93-1.06)	NA	NA	1.09 (1.00 - 1.19)	NA
	Stringency index: >= 70	NA	NA	ref	NA	NA	ref
	Stringency index: < 70	NA	NA	1.34 (1.31-1.37)	NA	NA	1.36 (1.32-1.41)
		main results			gender = female
		1st Research Question	2nd Research Question	3rd Research Question	1st Research Question	2nd Research Question	3rd Research Question
	Variable	Mean Ratio (95% CI)			Mean Ratio (95% CI)
	Age group: 19-45	ref	ref	ref	ref	ref	ref
	Age group: 0-18	1.13 (1.10-1.16)	1.49 (1.27-1.75)	1.16 (1.11-1.20)	1.09 (1.05-1.13)	1.21 (0.98-1.49)	1.06 (1.01-1.12)
	Agegroup: 46-65	0.99 (0.97-1.01)	0.99 (0.91-1.07)	0.98 (0.95-1.01)	1.00 (0.97-1.02)	0.91 (0.81-1.03)	0.97 (0.93-1.01)
	Age group: >=66	1.00 (0.98-1.02)	1.04 (0.95-1.16)	0.96 (0.93-1.00)	1.01 (0.98-1.04)	1.04 (0.91-1.21)	0.96 (0.91-1.00)
	Gender: Male	ref	ref	ref	ref	ref	ref
	Gender: Female	1.00 (0.99-1.02)	1.02 (0.96-1.09)	1.02 (1.00-1.04)	NA	NA	NA
	Household size: 1	ref	ref	ref	ref	ref	ref
	Household size: 2	1.00 (0.98-1.02)	0.91 (0.84-0.98)	1.00 (0.98-1.03)	0.97 (0.95-1.00)	0.92 (0.83-1.03)	0.97 (0.94-1.01)
	Household size: >=3	1.04 (1.02-1.06)	0.89 (0.82-0.97)	1.01 (0.98-1.04)	1.05 (1.02-1.08)	1.00 (0.88-1.13)	1.02 (0.98-1.06)
	Occupational status: Employed	ref	ref	ref	ref	ref	ref
	Occupational status: Retired	0.94 (0.92-0.96)	1.02 (0.95-1.11)	0.97 (0.95-1.00)	0.95 (0.92-0.98)	1.02 (0.91-1.15)	0.99 (0.95-1.03)
	Occupational status: Homemaker	0.88 (0.85-0.91)	0.97 (0.84-1.14)	0.89 (0.84-0.93)	0.88 (0.85-0.92)	0.92 (0.77-1.09)	0.89 (0.84-0.94)
	Occupational status: Student	0.97 (0.93-1.00)	1.11 (0.95-1.30)	0.92 (0.88-0.96)	0.93 (0.89-0.97)	0.95 (0.77-1.16)	0.88 (0.82-0.94)
	Occupational status: Unemployed	0.91 (0.88-0.94)	0.99 (0.86-1.14)	0.92 (0.88-0.96)	0.88 (0.85-0.92)	1.14 (0.93-1.38)	0.90 (0.84-0.96)
	Vaccine: unvaccinated	NA	ref	NA	NA	ref	NA
	Vaccine: vaccinated	NA	0.99 (0.93-1.06)	NA	NA	0.91 (0.83: 0.99)	NA
	Stringency index: >= 70	NA	NA	ref	NA	NA	ref
	Stringency index: < 70	NA	NA	1.34 (1.31-1.37)	NA	NA	1.31 (1.27-1.35)

## Sheet: Table S4
	Table S4 Stratified analyses: Mean Ratios and 95% confidence intervals (CIs) between riSD and covariates from Research Questions 1, 2, and 3
		main result	interaction analyses
	Variable	2nd Research Question	vaccine * age group	vaccine * gender
	Age group: 19-45	ref	ref	ref
	Age group: 0-18	1.49 (1.27-1.75)	1.51 (1.21-1.89)	1.53 (1.30-1.80)
	Agegroup: 46-65	0.99 (0.91-1.07)	0.93 (0.83-1.05)	0.99 (0.91-1.08)
	Age group: >=66	1.04 (0.95-1.16)	0.95 (0.83-1.08)	1.06 (0.96-1.08)
	Gender: Male	ref	ref	ref
	Gender: Female	1.02 (0.96-1.09)	1.02(0.96-1.09)	1.16 (1.06-1.27)
	Household size: 1	ref	ref	ref
	Household size: 2	0.91 (0.84-0.98)	0.90 (0.84-0.97)	0.91 (0.84-0.98)
	Household size: >=3	0.89 (0.82-0.97)	0.89 (0.81-0.96)	0.89 (0.81-0.97)
	Occupational status: Employed	ref	ref	ref
	Occupational status: Retired	1.02 (0.95-1.11)	1.02 (0.95.1.11)	1.02 (0.94-1.11)
	Occupational status: Homemaker	0.97 (0.84-1.14)	0.97 (0.84-1.14)	0.98 (0.84-1.14)
	Occupational status: Student	1.11 (0.95-1.30)	1.10 (0.94-1.29)	1.11 (0.95-1-30)
	Occupational status: Unemployed	0.99 (0.86-1.14)	0.99 (0.80-1.02)	0.99 (0.86-1.13)
	Vaccine: unvaccinated	ref	ref	ref
	Vaccine: vaccinated	0.99 (0.93-1.06)	0.90 (0.80-1.22)	1.11 (1.02-1.21)
	vaccine:vaccinated:Age group: 0-18	NA	0.97 (0.95-1.31)	NA
	vaccine:vaccinated:Age group: 46-65	NA	1.12 (0.95-1.31)	NA
	vaccine:vaccinated:Age group: >=66	NA	1.22(1.03-1.44)	NA
	vaccine:vaccinated:Gender: Female	NA	NA	0.79 (0.70-0.90)
		main result	interaction analyses
	Variable	3rd Research Question	stringency index * age group	stringency index * gender
	Age group: 19-45	ref	ref	ref
	Age group: 0-18	1.16 (1.11-1.20)	1.18 (1.11-1.26)	1.16 (1.11-1.20)
	Agegroup: 46-65	0.98 (0.95-1.01)	1.10 (1.05-1.16)	0.98 (0.95-1.01)
	Age group: >=66	0.96 (0.93-1.00)	1.06 (1.01-1.12)	0.97 (0.94-1.00)
	Gender: Male	ref	ref	ref
	Gender: Female	1.02 (1.00-1.04)	1.02 (1.00-1.04)	1.04 (1.00-1.08)
	Household size: 1	ref	ref	ref
	Household size: 2	1.00 (0.98-1.03)	1.00 (0.98-1.03)	1.00 (0.98-1.03)
	Household size: >=3	1.01 (0.98-1.04)	1.01 (0.98-1.04)	1.01 (0.99-1.04)
	Occupational status: Employed	ref	ref	ref
	Occupational status: Retired	0.97 (0.95-1.00)	0.97 (0.95-1.00)	0.97 (0.95-1.00)
	Occupational status: Homemaker	0.89 (0.84-0.93)	0.89 (0.85-0.93)	0.89 (0.84-0.93)
	Occupational status: Student	0.92 (0.88-0.96)	0.92 (0.88-0.97)	0.92 (0.88-0.97)
	Occupational status: Unemployed	0.92 (0.88-0.96)	0.92 (0.88-0.96)	0.92 (0.88-0.96)
	Stringency index: >= 70	ref	ref	ref
	Stringency index: < 70	1.34 (1.31-1.37)	1.48 (1.42-1.54)	1.36 (1.32-1.40)
	Stringency index: <70 Age group: 0-18	NA	0.97 (0.90-1.05)	NA
	Stringency index: <70 Age group: 46-65	NA	0.84 (0.79-0.89)	NA
	Stringency index: <70 Age group: >=66	NA	0.87 (0.82-0.93)	NA
	Stringency index: <70 Gender: Female	NA	NA	0.97 (0.92-1.01)

## Sheet: Figure S1
Fig. S1 Raw and Pearson residuals of predicted non-household contacts by age group over time. Raw residuals represent the difference between observed and expected contact numbers and show larger variability during periods of high contact activity (e.g., summer). Pearson residuals are standardized by the model-predicted variance, which makes them comparable across individuals and model settings; t…
